# Supplementary material
Source: PubMed Central journal article supplement (PMC5544390)

**Supplemental Data**

**Heterozygous *De Novo* *UBTF* Gain-of-Function Variant  
Is Associated with Neurodegeneration in Childhood**

**Simon Edvardson, Claudia M. Nicolae, Pankaj B. Agrawal, Cyril Mignot, Katelyn Payne, Asuri Narayan Prasad, Chitra Prasad, Laurie Sadler, Caroline Nava, Thomas E. Mullen, Amber Begtrup, Berivan Baskin, Z e Powis, Avraham Shaag, Boris Keren, George-Lucian Moldovan, and Orly Elpeleg**

Figure S1: c.628G>A variant in the *UBTF* gene.

DNA chromatogram around the variant site (arrow) in control DNA (upper panel) and in the sample of an affected individual (lower panel)

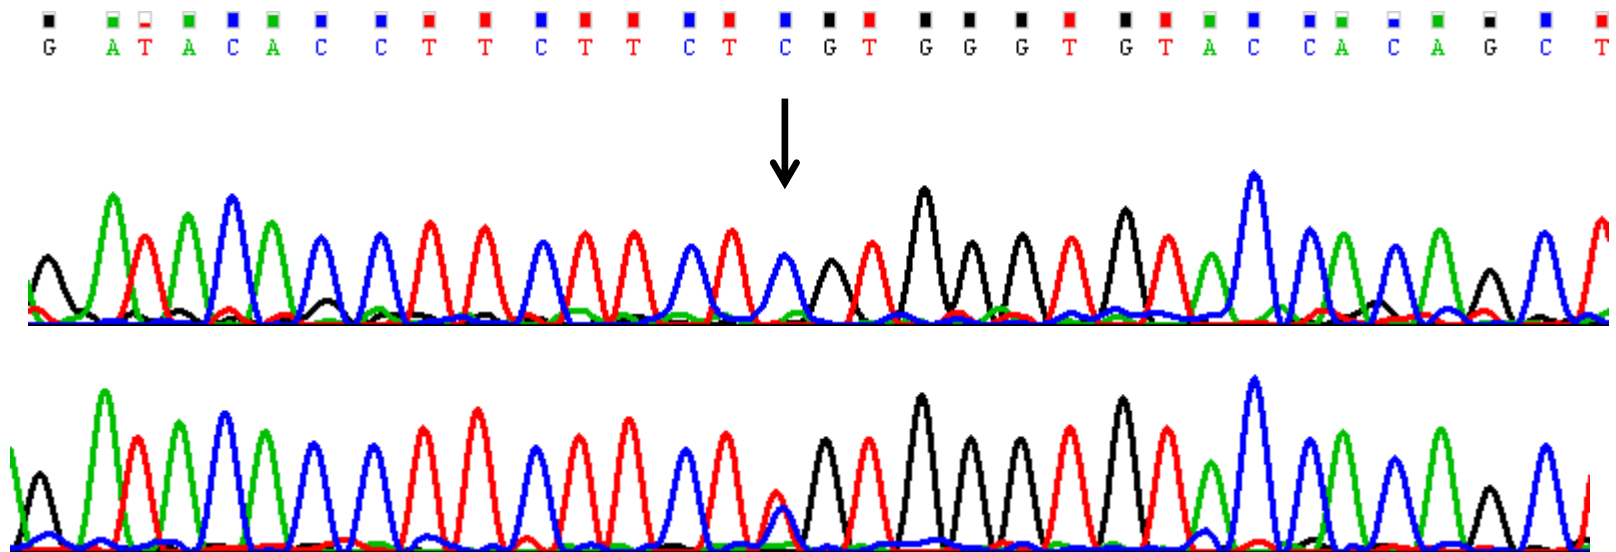

Supplement: mmc1.pdf [file mmc1.pdf]
